# Supplementary material
Source: Springer Nature journal article supplement (https://www.springermedizin.de/resource/supplementary/13063_2013_2063_MOESM4_ESM.pdf/9621302)

Mean ICC estimate

Total merges

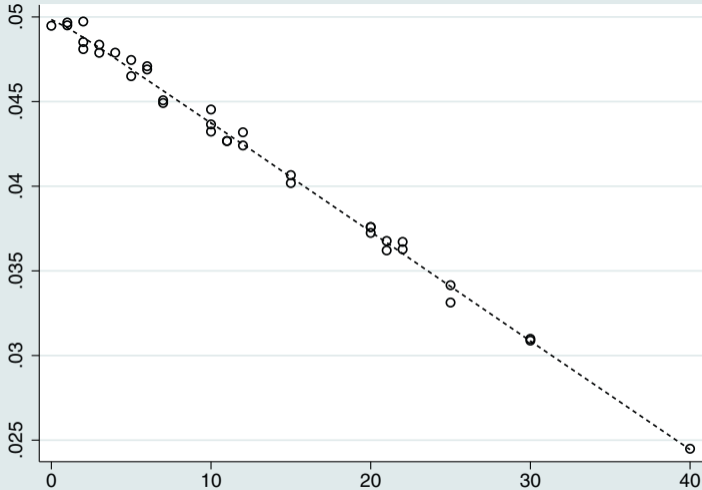

Supplement: MOESM4 [file 9621302]
